# Supplementary material
Source: PubMed Central journal article supplement (PMC4844807)
Supplement: NIHMS771755-supplement.pdf [file NIHMS771755-supplement.pdf]

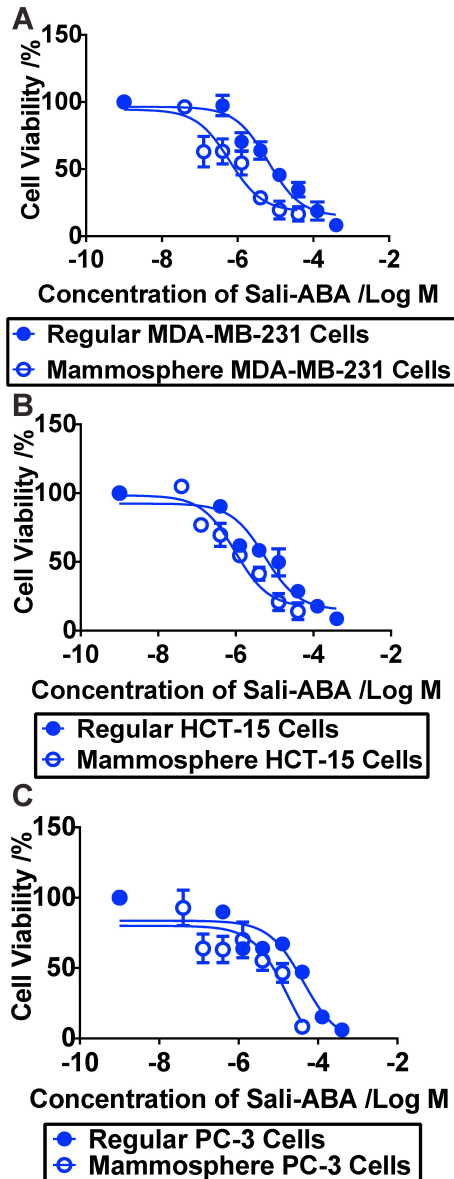

**Figure S1. A.** The viability profile of regular MDA-MB-231 cells versus mammosphere MDA-MB-231 cells after the cells were exposed to different concentrations of Sali-ABA for 72 hours. The  $IC_{50}$  value of Sali-ABA in the regular cells is significantly greater than that in the mammosphere cells ( $6.4 \mu\text{M}$ , 95% CI= $3.8\sim 10.9 \mu\text{M}$  versus  $0.6 \mu\text{M}$ , 95% CI= $0.3\sim 1.2 \mu\text{M}$ ,  $P < 0.0001$ ,  $t$ -test). **B.** The viability profile of regular HCT-15 cells versus mammosphere HCT-15 cells after the cells were exposed to different concentrations of Sali-ABA for 72 hours. The  $IC_{50}$  value of Sali-ABA in the regular cells is significantly greater than that in the mammosphere cells ( $5.6 \mu\text{M}$ , 95% CI= $3.1\sim 10.4 \mu\text{M}$  versus  $1.0 \mu\text{M}$ , 95% CI= $0.6\sim 1.6 \mu\text{M}$ ,  $P < 0.0001$ ,  $t$ -test). **C.** The viability profile of regular PC-3 cells versus mammosphere PC-3 cells after the cells were exposed to different concentrations of Sali-ABA for 72 hours. The  $IC_{50}$  value of Sali-ABA in the regular cells is significantly greater than that in the mammosphere cells ( $42.6 \mu\text{M}$ , 95% CI= $19.7\sim 91.8 \mu\text{M}$  versus  $17.0 \mu\text{M}$  95% CI= $3.8\sim 76.6 \mu\text{M}$ ,  $P < 0.0001$ ,  $t$ -test).

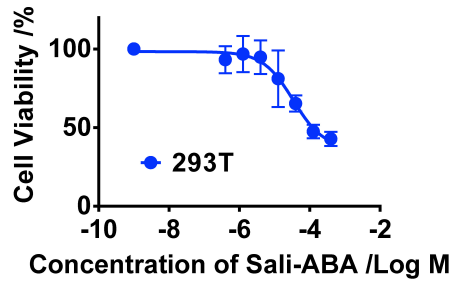

**Figure S2.** The viability profile of 293T cells after they were exposed to different concentrations of Sali-ABA for 72 hours. The  $IC_{50}$  value of Sali-ABA was 34.3  $\mu$ M (95% CI=16.1~73.3  $\mu$ M), which is greater than the value in 4T1-luc cells.

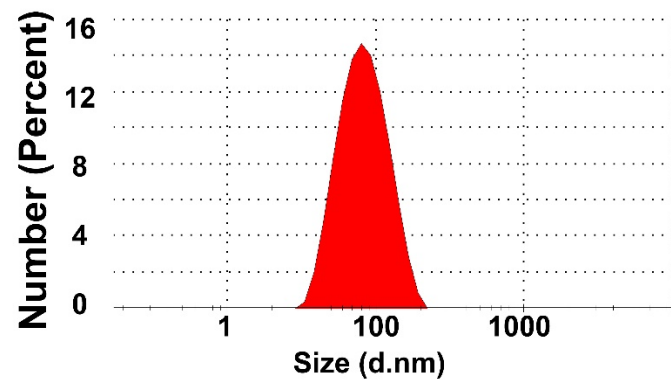

**Figure S3.** Hydrodynamic diameters of the PTX NP. The sample concentration was 25  $\mu$ M.
